# Supplementary material
Source: PubMed Central journal article supplement (PMC3754740)
Supplement: JB.00290-13_zjb999092771so1.pdf [file JB.00290-13_zjb999092771so1.pdf]

**Table S1. Bacterial strains used for this study.**

| <b>species</b>        | <b>strain</b> | <b>relevant genotype</b>                                                                                  | <b>source</b>         |
|-----------------------|---------------|-----------------------------------------------------------------------------------------------------------|-----------------------|
| <i>S. Typhimurium</i> | 14028s        | wild type                                                                                                 | ATCC                  |
| <i>S. Typhimurium</i> | KAM30         | $\Delta dgaR::kan$                                                                                        | this study            |
| <i>S. Typhimurium</i> | KAM68         | $\Delta dgaR$                                                                                             | this study            |
| <i>S. Typhimurium</i> | KAM44         | $\Delta dgaAB::kan$                                                                                       | this study            |
| <i>S. Typhimurium</i> | KAM71         | $\Delta dgaAB$                                                                                            | this study            |
| <i>S. Typhimurium</i> | KAM117        | $\Delta dgaE::kan$                                                                                        | this study            |
| <i>S. Typhimurium</i> | KAM123        | $\Delta dgaE$                                                                                             | this study            |
| <i>S. Typhimurium</i> | KAM118        | $\Delta dgaF::kan$                                                                                        | this study            |
| <i>S. Typhimurium</i> | KAM124        | $\Delta dgaF$                                                                                             | this study            |
| <i>S. Typhimurium</i> | KAM126        | $\Delta dgaF\Delta eda::kan$                                                                              | this study            |
| <i>S. Typhimurium</i> | KAM1262       | $\Delta dgaF\Delta eda$                                                                                   | this study            |
| <i>S. Typhimurium</i> | KAM111        | $\Delta eda::kan$                                                                                         | this study            |
| <i>S. Typhimurium</i> | KAM106        | $\Delta eda$                                                                                              | this study            |
| <i>S. Typhimurium</i> | KAM121        | $\Delta dgaEF::kan$                                                                                       | this study            |
| <i>S. Typhimurium</i> | KAM122        | $\Delta dgaEF$                                                                                            | this study            |
| <i>S. Typhimurium</i> | KAM27         | $\Delta STM14\_0667::kan$                                                                                 | this study            |
| <i>S. Typhimurium</i> | KAM69         | $\Delta STM14\_0667$                                                                                      | this study            |
| <i>S. Typhimurium</i> | KAM31         | $\Delta STM14\_5448::kan$                                                                                 | this study            |
| <i>S. Typhimurium</i> | KAM67         | $\Delta STM14\_5448$                                                                                      | this study            |
| <i>S. Typhimurium</i> | KAM75         | $\Delta STM14\_0673 \Delta STM14\_0672$<br>$\Delta dgaAB \Delta STM14\_5449$<br>$\Delta STM14\_5450::kan$ | this study            |
| <i>S. Typhimurium</i> | KAM81         | $\Delta STM14\_0673 \Delta STM14\_0672$<br>$\Delta dgaAB \Delta STM14\_5449$<br>$\Delta STM14\_5450$      | this study            |
| <i>S. Typhimurium</i> | KAM96         | $\Delta STM14\_0667 \Delta dgaR$<br>$\Delta STM14\_5448::kan$                                             | this study            |
| <i>S. Typhimurium</i> | KAM100        | $\Delta STM14\_0667 \Delta dgaR$<br>$\Delta STM14\_5448$                                                  | this study            |
| <i>S. Typhimurium</i> | ACB01         | $\Delta rpoN$                                                                                             | A. Bono               |
| <i>S. Typhimurium</i> | KAM91         | $\Delta ptsH::kan$                                                                                        | this study            |
| <i>S. Typhimurium</i> | KAM95         | $\Delta ptsH$                                                                                             | this study            |
| <i>S. Typhimurium</i> | KAM131        | $\Delta dgaAB \Delta eda$                                                                                 | this study            |
| <i>S. Typhimurium</i> | JE16465       | <i>metE205 ara-9 crr891::kan+</i>                                                                         | J. Escalante-Semerena |
| <i>S. Typhimurium</i> | DM12321       | <i>met+ ptsG4152::Tn10d(Tc)</i>                                                                           | D. Downs              |

|                       |              |                                                                                                                                                                                     |                            |
|-----------------------|--------------|-------------------------------------------------------------------------------------------------------------------------------------------------------------------------------------|----------------------------|
| <i>S. Typhimurium</i> | KAM139       | $\Delta$ eda/ pLAC22+dgaF                                                                                                                                                           | this study                 |
| <i>S. Typhimurium</i> | KAM143       | $\Delta$ eda/ pLAC22                                                                                                                                                                | this study                 |
| <i>S. Typhimurium</i> | KAM140       | $\Delta$ dgaAB / pLAC22+dgaABCDEF                                                                                                                                                   | this study                 |
| <i>S. Typhimurium</i> | KAM145       | $\Delta$ dgaAB / pLAC22                                                                                                                                                             | this study                 |
| <i>S. Typhimurium</i> | KAM141       | $\Delta$ dgaR / pLAC22+dgaABCDEF                                                                                                                                                    | this study                 |
| <i>S. Typhimurium</i> | KAM146       | $\Delta$ dgaR / pLAC22                                                                                                                                                              | this study                 |
| <i>E. coli</i>        | DH5 $\alpha$ | <i>fhuA2 lac(del)U169 phoA glnV44 <math>\Phi</math>80' lacZ(del)M15 gyrA96 recA1 relA1 endA1 thi-1 hsdR17</i>                                                                       | S. Kustu                   |
| <i>E. coli</i>        | KAM134       | DH5 $\alpha$ / pLAC22+dgaABCDEF                                                                                                                                                     | this study                 |
| <i>E. coli</i>        | DH5 $\alpha$ | DH5 $\alpha$ / pLAC22                                                                                                                                                               | E. Altman                  |
| <i>E. coli</i>        | JM101        | <i>glnV44 thi-1 <math>\Delta</math>(lac-proAB) F'[lacI<sup>+</sup>Z<math>\Delta</math>M15 traD36 proAB<sup>+</sup>]</i>                                                             | S. Kustu                   |
| <i>E. coli</i>        | KAM142       | JM101 / pLAC22+dgaABCDEF                                                                                                                                                            | this study                 |
| <i>E. coli</i>        | KAM150       | JM101 / pLAC22                                                                                                                                                                      | this study                 |
| <i>E. coli</i>        | BL21         | <i>E. coli</i> B F- <i>dcm ompT hsdS</i> (r <sub>B</sub> -m <sub>B</sub> -) <i>gal [malB<sup>+</sup>]<sub>K-12</sub>(<math>\lambda^S</math>)</i>                                    | S. Kustu                   |
| <i>E. coli</i>        | KAM143       | BL21 / pLAC22+dgaABCDEF                                                                                                                                                             | this study                 |
| <i>E. coli</i>        | KAM149       | BL21 / pLAC22                                                                                                                                                                       | this study                 |
| <i>E. coli</i>        | BL21(DE3)    | F <sup>-</sup> <i>ompT gal dcm lon hsdS</i> <sub>B</sub> (r <sub>B</sub> <sup>-</sup> m <sub>B</sub> <sup>-</sup> ) $\lambda$ (DE3 [ <i>lacI lacUV5-T7 gene 1 ind1 sam7 nin5</i> ]) | (1)                        |
| <i>E. coli</i>        | KAM155       | BL21/DE3 $\lambda$ /pACYC184+plyE/pE T21a+dgaE                                                                                                                                      | this study                 |
| <i>E. coli</i>        | KAM154       | BL21/DE3 $\lambda$ /pACYC184+plyE/pE T21a+dgaF                                                                                                                                      | this study                 |
| <i>E. coli</i>        | IAI1         | Wild type commensal                                                                                                                                                                 | A. Maurelli and E. Denamur |

**Table S2. Plasmids used in this study.**

| <b>plasmid</b>              | <b>relevant characteristics</b>                                                                                                                                   | <b>Ref.</b> |
|-----------------------------|-------------------------------------------------------------------------------------------------------------------------------------------------------------------|-------------|
| pKD46                       | expresses phage $\lambda$ recombinase genes $\gamma$ , $\beta$ and <i>exo</i> from arabinose-inducible P <sub>araB</sub> promoter; temperature-sensitive replicon | (2)         |
| pKD4                        | template plasmid used to generate amplicons for inactivation of target genes in the $\lambda$ Red system                                                          | (2)         |
| pCP20                       | expresses FLP enzyme for removal of <i>kan</i> gene flanked by FRT sites; temperature-sensitive replicon                                                          | (3)         |
| pLAC22                      | expression vector derived from pBR322 that carries the <i>E. coli lac</i> promoter/operator and <i>lacI</i> <sup>q</sup>                                          | (4)         |
| pLAC22+<br><i>dgaABCDEF</i> | carries <i>S. Typhimurium dgaABCDEF</i> under control of <i>lac</i> promoter/operator in pLAC22                                                                   | this study  |
| pLAC22+<br><i>dgaF</i>      | carries <i>S. Typhimurium dgaF</i> under control of <i>lac</i> promoter/operator in pLAC22                                                                        | this study  |
| pET21a                      | vectors carries an N-terminal T7 Tag sequence and T7 promoter                                                                                                     | Novagen     |
| pET21a+<br><i>dgaE</i>      | carries <i>S. Typhimurium dgaE</i> under control of T7 promoter in pET21a                                                                                         | this study  |
| pET21a+<br><i>dgaF</i>      | carries <i>S. Typhimurium dgaF</i> under control of T7 promoter in pET21a                                                                                         | this study  |

**Table S3. Primers used in this study.**

| <b>Sequence</b>                                                                      | <b>Experiment</b>                                      |
|--------------------------------------------------------------------------------------|--------------------------------------------------------|
| 5'-ATG AGA CGT ATT GAG ATC GTA CTG GGA<br>GAG TGT GTA GGC TGG AGC TGC TTC-3'         | <i>dgaR</i> knock out $\lambda$ -Red                   |
| 5'-TTA ACT ATA GAG CAG TTC GTA GAT ATA AAC<br>ATA TGA ATA TCC TCC TTA-3'             | <i>dgaR</i> knock out $\lambda$ -Red                   |
| 5'-CAT TTT TCG CCA GGC CTT TAA TCA GGA AGG<br>CGA CAC CAT ATG AAT ATC CTC CTT A-3'   | <i>dgaAB</i> knock out $\lambda$ -Red                  |
| 5'-ATG GCC AAT ATC GTT TTA TGC CGC ATC GAC<br>AGC CGT TGT GTA GGC TGG AGC TGC TTC-3' | <i>dgaAB</i> knock out $\lambda$ -Red                  |
| 5'-ATG ACG CCG AAT ATC TAT CAA CAA CTG<br>GGC ATA TGA ATA TCC TCC TTA-3'             | <i>dgaE</i> knock out $\lambda$ -Red                   |
| 5'-TTA ATC TGC TGC ATG TTC TGC AAT CTC CCT<br>TGT AGG CTG GAG CTG CTT C-3'           | <i>dgaE</i> knock out $\lambda$ -Red                   |
| 5'-GGC GAT CCG TCA CCT GAG GAA TAA GAT<br>GAC TGT GTA GGC TGG AGC TGC TTC-3'         | <i>dgaF</i> knock out $\lambda$ -Red                   |
| 5'-AGG GAG ATT GCA GAA CAT GCA GAT TAA<br>CAT ATG AAT ATC CTT A-3'                   | <i>dgaF</i> knock out $\lambda$ -Red                   |
| 5'-CACTAG TAA TCA GGC GAG AGA AGA ATT<br>CCG TGT GTA GGC TGG AGC TGC TTC-3'          | <i>eda</i> knock out $\lambda$ -Red                    |
| 5'-ATA AGC AAG CGC CAT CGG GCA TTT AAC<br>GGC CAT ATG AAT ATC CTC CTT A-3'           | <i>eda</i> knock out $\lambda$ -Red                    |
| 5'-CCG TAA AGC AAA CTG TTG AAG TCA CCA<br>ATA AGC TGG TGT GTA GGC TGG AGC TGC TTC-3' | <i>ptsO</i> knock out $\lambda$ -Red                   |
| 5'-GGT GAC TGT CAT CAA ATA CCG GGA CGG<br>CGT TGG CAT ATG AAT ATC CTC CTT A-3'       | <i>ptsO</i> knock out $\lambda$ -Red                   |
| 5'-CCT GTT GGG ATG TGT TAA GAA ACT GGC TGA<br>TAA TGA CAT ATG AAT ATC CTC CTT A-3'   | STM14_0673/STM14_0672 knock<br>out $\lambda$ -Red      |
| 5'-ATG ATC AAA TTA GTG CGC ATT GAT TAC CGC<br>CTG CTG TGT GTA GGC TGG AGC TGC TTC-3' | STM14_0673/STM14_0672 knock<br>out $\lambda$ -Red      |
| 5'-CCG GTT GCG AGG CCG CAA ATT TCG GCA TAT<br>TGA CCA CAT ATG AAT ATC CTC CTT A-3'   | STM14_5449/STM14_5450 knock<br>out $\lambda$ -Red      |
| 5'-ACG GGT GGA TCA TCG TTT ATT ACA TGG ACA<br>GGT CGC TGT GTA GGC TGG AGC TGC TTC-3' | STM14_5449/STM14_5450 knock<br>out $\lambda$ -Red      |
| 5'-TTG GCG TCT GGA TCT TCG-3'                                                        | STM14_0667 knock out<br>overlapping PCR $\lambda$ -Red |
| 5'-CAG CCT ACA CAA TCG CTC AAG ATG GTG ACT<br>AAT AAT GCT GCG-3'                     | STM14_0667 knock out<br>overlapping PCR $\lambda$ -Red |
| 5'-CTG TGT CAC TGA AAA TTG CTT TGA GGT ATG<br>ATT GAG CGA CTG GTC-3'                 | STM14_0667 knock out<br>overlapping PCR $\lambda$ -Red |
| 5'-ATC AGG AGT CTA TCT GTA TTC TGC-3'                                                | STM14_0667 knock out<br>overlapping PCR $\lambda$ -Red |
| 5'-CAT CAT AAT TGC TGA TGT GAT AAT CGT GAG<br>TGTGTA GGC TGG AGC TGC TTC-3'          | STM14_5448 knock out $\lambda$ -Red                    |
| 5'-TTA AAA CTG TTG ATC TTG CTC GAT AAG TTC                                           | STM14_5448 knock out $\lambda$ -Red                    |

|                                          |                      |
|------------------------------------------|----------------------|
| CAT ATG AAT ATC CTC CTT A-3'             |                      |
| 5'-GGA AGG CTC GCT GAT CCT GA-3'         | <i>dgaAB</i> qRT-PCR |
| 5'-CAG GCG GTT AGC ATC CCT TG-3'         | <i>dgaAB</i> qRT-PCR |
| 5'-TAT CGA AGA CGG GAT CAA CC-3'         | <i>rpoD</i> qRT-PCR  |
| 5'-GGA CAA ACG AGC CTC TTC AG-3'         | <i>rpoD</i> qRT-PCR  |
| 5'-CAT ATG ACG CCG AAT ATC TAT CAA-3'    | DgaE purification    |
| 5'-AAG CTT ATC TGC TGC ATG TTC TGC-3'    | DgaE purification    |
| 5'-CAT ATG CAG CAG ATT AAT TTT TAT CG-3' | DgaF purification    |
| 5'-AAG CTT CAC CAG CGC TTT GAC TAT C-3'  | DgaF purification    |

**Table S4. Distribution of *dga* genes within the domain Bacteria.**

| genus                     | <i>dgaABCD</i>     | <i>dgaE</i> | <i>dgaF</i> | <i>dgaR</i>         | predicted RpoN-dependent promoter sequences |
|---------------------------|--------------------|-------------|-------------|---------------------|---------------------------------------------|
| <i>Salmonella</i>         | <sup>a</sup> 71/86 | 71/86       | 71/86       | 66/86               | <sup>b</sup> TGGCACARCCTTTGCT               |
| <i>Escherichia</i>        | 29/149             | 22/149      | 22/149      | <sup>b</sup> 18/149 | TGGCACGTCCTTTGCT                            |
| <i>Citrobacter</i>        | 6/8                | 6/8         | 6/8         | 6/8                 | TGGCACAGCCTTTGCT                            |
| <i>Enterobacter</i>       | 4/14               | 4/14        | 4/14        | 4/14                | <sup>b</sup> TGGCACGSSSTTTGCT               |
| <i>Enterobacteriaceae</i> | 1/1                | 1/1         | 1/1         | 1/1                 | TGGCATGCGCTTTGCT                            |
| <i>Klebsiella</i>         | 2/25               | 2/25        | 2/25        | 2/25                | TGGCACAGCCTTTGCT                            |
| <i>Serratia</i>           | 1/11               | 1/11        | 1/11        | 1/11                | TGGCACAGGCATTGCT                            |
| <i>Hafnia</i>             | 1/1                | 1/1         | 1/1         | 0/0                 | TGGCATGCGCTTTGCT                            |
| <i>Enterococcus</i>       | 57/108             | 9/108       | 8/108       | 56/108              | TGGCACACTTATTGCT                            |
| <i>Lactobacillus</i>      | 2/126              | 2/126       | 2/126       | 2/126               | TGGCACGAAATTTGCT                            |

<sup>a</sup>Numerator denotes the number of genomes for a given genus that possessed the indicated gene(s), while the denominator indicates the number of genomes for the genus in which it was possible to determine which of the *dga* orthologs were present. The data for the analysis were obtained from the Integrated Microbial Genomes database (<http://img.jgi.doe>) on February 20, 2013.

<sup>b</sup>Predicted RpoN-dependent promoter sequences upstream of the *dgaA* orthologs. For positions where the sequence varied, R is A or G and S is G or C.

**Table S5. Comparison of properties of complete genomes with the *dga* loci.**

| Characteristic                      | Complete genome <sup>a</sup> |      |      |      | <i>dga</i> locus <sup>b</sup> |      |                   |      |
|-------------------------------------|------------------------------|------|------|------|-------------------------------|------|-------------------|------|
|                                     | ST                           | EC   | EA   | EF   | ST                            | EC   | EA                | EF   |
| % G+C                               | 52.2                         | 50.8 | 54.8 | 37.5 | 55.8                          | 54.1 | 58.5              | 39.5 |
| S3 <sup>c</sup>                     | 59.0                         | 55.9 | 65.7 | 30.2 | 67.5                          | 64.2 | 74.1              | 36.0 |
| $\tau^*_{\text{CTAG}}$ <sup>d</sup> | 0.21                         | 0.24 | 0.29 | 0.89 | 0.00 <sup>e</sup>             | 0.70 | 0.00 <sup>e</sup> | 0.89 |

<sup>a</sup> Bacterial strains are abbreviated as follows: ST, *Salmonella enterica* serovar Typhimurium 14028s; EC, *Escherichia coli* IAI1; EA, *Enterobacter aerogenes* KCTC 2190; EF, *Enterococcus faecalis* 62.

<sup>b</sup> The *dga* locus encompasses the following genes and intervening intergenic sequences for their respective genomes: STM14\_4550 through STM14\_4543, ECIAI1\_3068 through ECIAI1\_3062, EAE\_10150 through EAE\_10120, and EF62\_0067 through EF62\_0061.

<sup>c</sup> S3 refers to the percent G+C at the third codon position of protein-coding genes.

<sup>d</sup> Relative abundance of the CTAG tetranucleotide (see Materials and Methods and ref.(5)).

<sup>e</sup> No CTAG tetranucleotide is present in the sequence.

**Table S6. Genome signature comparisons.**

| Sequence        |    | Complete genome <sup>a</sup> |    |    |     | <i>dga</i> locus |    |     |     |
|-----------------|----|------------------------------|----|----|-----|------------------|----|-----|-----|
|                 |    | ST                           | EC | EA | EF  | ST               | EC | EA  | EF  |
| Complete genome | ST | 59                           | 69 | 63 | 107 | 47               | 60 | 68  | 104 |
|                 | EC |                              | 55 | 74 | 89  | 62               | 61 | 80  | 91  |
|                 | EA |                              |    | 61 | 110 | 43               | 53 | 56  | 104 |
|                 | EF |                              |    |    | 59  | 105              | 98 | 116 | 53  |
| PTS locus       | ST |                              |    |    |     | -                | 30 | 36  | 92  |
|                 | EC |                              |    |    |     |                  | -  | 40  | 84  |
|                 | EA |                              |    |    |     |                  |    | -   | 109 |
|                 | EF |                              |    |    |     |                  |    |     | -   |

<sup>a</sup> Bacterial strains are abbreviated as follows: ST, *Salmonella enterica* serovar Typhimurium 14028s; EC, *Escherichia coli* IAI1; EA, *Enterobacter aerogenes* KCTC 2190; EF, *Enterococcus faecalis* 62.

Average  $\delta^*$ -differences between non-overlapping 7 kb segments are shown (multiplied by 1,000). Diagonal entries represent average  $\delta^*$ -differences between segments from the same genome whereas non-diagonal entries show average  $\delta^*$ -differences between segments from different genomes or *dga* loci.  $\delta^*$ -differences within *dga* loci were not assessed because each *dga* locus represents a single 7 kb sequence sample.



**Table S7. BLAST comparisons among proteins encoded by the *dga* locus.**

| DgaR <sup>a</sup> |            |             |           |           |
|-------------------|------------|-------------|-----------|-----------|
| Gene              | STM14_4550 | ECIA11_3068 | EAE_10150 | EF62_0067 |
| STM14_4550        | 1907       | 1674        | 1580      | 582       |
| ECIA11_3068       |            | 1941        | 1550      | 579       |
| EAE_10150         |            |             | 1938      | 588       |
| EF62_0067         |            |             |           | 1910      |

  

| DgaA <sup>a</sup> |            |             |           |           |
|-------------------|------------|-------------|-----------|-----------|
| Gene              | STM14_4548 | ECIA11_3067 | EAE_10145 | EF62_0066 |
| STM14_4548        | 285        | 243         | 226       | 91        |
| ECIA11_3067       |            | 289         | 226       | 95        |
| EAE_10145         |            |             | 286       | 97        |
| EF62_0066         |            |             |           | 269       |

  

| DgaB <sup>a</sup> |            |             |           |           |
|-------------------|------------|-------------|-----------|-----------|
| Gene              | STM14_4547 | ECIA11_3066 | EAE_10140 | EF62_0065 |
| STM14_4547        | 326        | 304         | 301       | 172       |
| ECIA11_3066       |            | 326         | 295       | 169       |
| EAE_10140         |            |             | 327       | 170       |
| EF62_0065         |            |             |           | 326       |

  

| DgaC <sup>a</sup> |            |             |           |           |
|-------------------|------------|-------------|-----------|-----------|
| Gene              | STM14_4546 | ECIA11_3065 | EAE_10135 | EF62_0064 |
| STM14_4546        | 496        | 483         | 484       | 333       |
| ECIA11_3065       |            | 496         | 476       | 329       |
| EAE_10135         |            |             | 495       | 338       |
| EF62_0064         |            |             |           | 487       |

  

| DgaD <sup>a</sup> |            |             |           |           |
|-------------------|------------|-------------|-----------|-----------|
| Gene              | STM14_4545 | ECIA11_3064 | EAE_10130 | EF62_0063 |
| STM14_4545        | 571        | 560         | 538       | 350       |
| ECIA11_3064       |            | 572         | 529       | 352       |
| EAE_10130         |            |             | 568       | 350       |
| EF62_0063         |            |             |           | 570       |

  

| DgaE <sup>a</sup> |            |             |           |           |
|-------------------|------------|-------------|-----------|-----------|
| Gene              | STM14_4544 | ECIA11_3063 | EAE_10125 | EF62_0062 |
| STM14_4544        | 752        | 636         | 570       | 287       |
| ECIA11_3063       |            | 750         | 558       | 286       |
| EAE_10125         |            |             | 751       | 266       |
| EF62_0062         |            |             |           | 748       |

| DgaF <sup>a</sup> |            |             |           |           |
|-------------------|------------|-------------|-----------|-----------|
| Gene              | STM14_4543 | ECIA11_3062 | EAE_10120 | EF62_0061 |
| STM14_4543        | 504        | 415         | 396       | 207       |
| ECIA11_3062       |            | 515         | 392       | 200       |
| EAE_10120         |            |             | 507       | 202       |
| EF62_0061         |            |             |           | 507       |

The table shows pairwise BLAST bit scores between protein products of orthologous genes. The data were obtained running the blastp at the NCBI server (<http://blast.ncbi.nlm.nih.gov/>) with default parameters.

<sup>a</sup> Protein product assignments based on the results of this study with *S. Typhimurium* 14028s.

### Literature Cited

1. **Studier FW, Rosenberg AH, Dunn JJ, Dubendorff JW.** 1990. Use of T7 RNA polymerase to direct the expression of cloned genes. *Methods Enzymol.* **185**:60-89.
2. **Datsenko KA, Wanner BL.** 2000. One-step inactivation of chromosomal genes in *Escherichia coli* K-12 using PCR products. *Proc. Natl. Acad. Sci. U. S. A.* **97**:6640-6645.
3. **Cherepanov PP, Wackernagel W.** 1995. Gene disruption in *Escherichia coli*: TcR and KmR cassettes with the option of Flp-catalyzed excision of the antibiotic-resistance determinant. *Gene* **158**:9-14.
4. **Warren JW, Walker JR, Roth JR, Altman E.** 2000. Construction and characterization of a highly regulable expression vector, pLAC11, and its multipurpose derivatives, pLAC22 and pLAC33. *Plasmid* **44**:138-151.
5. **Karlin S, Mrazek J, Campbell AM.** 1997. Compositional biases of bacterial genomes and evolutionary implications. *J. Bacteriol.* **179**:3899-3913.
